# Supplementary material for: Dexamethasone may improve severe COVID-19 via ameliorating endothelial injury and inflammation: A preliminary pilot study
Source: PubMed Central journal article supplement (PMC8253399; doi:10.1371/journal.pone.0254167), 2021-07-02
Supplement: pone.0254167.s001.pdf [file pone.0254167.s001.pdf]

**S1 Table. Comparing plasma biomarker concentrations between patients with hypertension and severe COVID-19 and hypertensive controls.**

|                       | Severe COVID-19 (n = 18) | Controls (n = 4)       | <i>P</i> |
|-----------------------|--------------------------|------------------------|----------|
| Ang-2, pg/mL          | 1050 (730–1587)          | 1146 (1104–1196)       | 0.733    |
| sTie2, pg/mL          | 16969 (13096–21040)      | 19689 (17898–21305)    | 0.268    |
| Endocan, pg/mL        | 1048 (558–1819)          | 383 (337–458)          | 0.089    |
| ICAM-1, pg/mL         | 413949 (293433–697463)   | 514049 (372715–623696) | 0.798    |
| IL-6, pg/mL           | 27.4 (11.9–38.6)         | 3.1 (2.6–3.7)          | 0.007    |
| sRAGE, pg/mL          | 5320 (3581–7454)         | 1686 (1651–1979)       | 0.008    |
| SP-D, pg/mL           | 5912 (2938–11080)        | 6269 (5423–6667)       | 0.932    |
| Syndecan-1, pg/mL     | 5107 (4301–8511)         | 2851 (2282–3520)       | 0.008    |
| TNF- $\alpha$ , pg/mL | 7.1 (5.1–9.5)            | 7.0 (6.3–7.7)          | 0.798    |
| vWF, pg/mL            | 4647 (2346–8798)         | 2723 (1674–3647)       | 0.148    |
| IFN- $\alpha$ , pg/mL | 136.9 (57.8–328.7)       | 14.9 (13.8–16.1)       | 0.002    |

Data are presented as median (interquartile range) and *P*-values were calculated using the Mann-Whitney *U* test.

Ang-2, angiotensin-2; COVID-19, coronavirus disease 2019; ICAM-1, intercellular adhesion molecule-1; IFN- $\alpha$ , interferon- $\alpha$ ; IL-6, interleukin-6; sTie2, soluble form of the Tie2 receptor; sRAGE, soluble receptor for advanced glycation end-products; SP-D, surfactant protein D; TNF- $\alpha$ , tumor necrosis factor- $\alpha$ ; vWF, von Willebrand factor.
