# Supplementary material for: Dexamethasone may improve severe COVID-19 via ameliorating endothelial injury and inflammation: A preliminary pilot study
Source: PubMed Central journal article supplement (PMC8253399; doi:10.1371/journal.pone.0254167), 2021-07-02
Supplement: pone.0254167.s002.pdf [file pone.0254167.s002.pdf]

**S2 Table. Correlations between the changes in plasma biomarkers and clinical parameters at day 4 and day 7.**

| <b>Δ Day 4</b>                     | Two-tailed Spearman correlation coefficient (non-parametric) |       |                   |                   |                   |                   |                   |            |                   |       |
|------------------------------------|--------------------------------------------------------------|-------|-------------------|-------------------|-------------------|-------------------|-------------------|------------|-------------------|-------|
|                                    | Ang-2                                                        | sTie2 | Endocan           | ICAM-1            | IL-6              | sRAGE             | SP-D              | Syndecan-1 | TNF-α             | vWF   |
| BT                                 | 0.18                                                         | 0.15  | 0.29              | 0.15              | 0.33              | -0.06             | -0.53             | 0.24       | 0.39 <sup>a</sup> | 0.17  |
| RR                                 | 0.48 <sup>b</sup>                                            | -0.05 | 0.12              | -0.12             | 0.08              | 0.23              | -0.19             | 0.12       | 0.07              | -0.29 |
| SpO <sub>2</sub> /FiO <sub>2</sub> | 0.17                                                         | -0.12 | -0.42             | -0.10             | -0.03             | 0.22              | 0.39 <sup>a</sup> | -0.27      | -0.22             | -0.07 |
| WBC                                | 0.04                                                         | -0.13 | 0.29              | -0.06             | 0.05              | -0.24             | -0.22             | -0.19      | 0.21              | 0.17  |
| LDH                                | 0.003                                                        | -0.14 | -0.04             | 0.06              | 0.09              | 0.47 <sup>b</sup> | -0.39             | -0.13      | 0.10              | -0.17 |
| CRP                                | 0.61 <sup>b</sup>                                            | 0.26  | -0.01             | 0.41 <sup>a</sup> | 0.49 <sup>b</sup> | 0.41 <sup>a</sup> | -0.14             | -0.10      | 0.35              | 0.29  |
| Rad score                          | 0.42 <sup>a</sup>                                            | 0.02  | 0.06              | 0.14              | 0.39 <sup>a</sup> | 0.46 <sup>b</sup> | 0.09              | -0.15      | 0.30              | -0.09 |
| <b>Δ Day 7</b>                     | Ang-2                                                        | sTie2 | Endocan           | ICAM-1            | IL-6              | sRAGE             | SP-D              | Syndecan-1 | TNF-α             | vWF   |
| BT                                 | 0.19                                                         | 0.35  | 0.49 <sup>b</sup> | 0.26              | 0.37 <sup>a</sup> | 0.05              | -0.67             | 0.23       | 0.34              | 0.11  |
| RR                                 | 0.28                                                         | -0.29 | 0.01              | 0.03              | -0.08             | 0.01              | 0.20              | 0.15       | 0.14              | -0.37 |
| SpO <sub>2</sub> /FiO <sub>2</sub> | 0.41 <sup>a</sup>                                            | 0.15  | -0.38             | 0.11              | 0.09              | 0.27              | 0.44 <sup>a</sup> | -0.01      | 0.13              | 0.26  |
| WBC                                | 0.18                                                         | -0.15 | 0.16              | 0.004             | 0.15              | 0.04              | -0.08             | -0.13      | 0.31              | 0.18  |
| LDH                                | 0.17                                                         | 0.01  | -0.06             | 0.14              | 0.35              | 0.48 <sup>b</sup> | 0.12              | 0.03       | 0.41 <sup>a</sup> | 0.13  |
| CRP                                | 0.64 <sup>b</sup>                                            | 0.28  | -0.04             | 0.41 <sup>a</sup> | 0.44 <sup>a</sup> | 0.42 <sup>a</sup> | -0.08             | 0.02       | 0.32              | 0.16  |
| Rad score                          | 0.66 <sup>b</sup>                                            | 0.30  | -0.25             | 0.37 <sup>a</sup> | 0.45 <sup>a</sup> | 0.42 <sup>a</sup> | 0.18              | -0.04      | 0.41 <sup>a</sup> | 0.20  |

Ang-2, angiotensin-2; BT, body temperature; CRP, C-reactive protein; FiO<sub>2</sub>, fraction of inspired oxygen; ICAM-1, intercellular adhesion molecule-1; IL-6, interleukin-6; LDH, lactate dehydrogenase; SpO<sub>2</sub>, pulse oximetric saturation; Rad score, radiologic score; RR, respiratory rate; sTie2, soluble form of the Tie2 receptor; sRAGE, soluble receptor for advanced glycation end-products; SP-D, surfactant protein D; TNF-α, tumor necrosis factor-α; vWF, von Willebrand factor; WBC, white blood cell.

<sup>a</sup>  $P < 0.05$ .

<sup>b</sup>  $P < 0.01$ .
