# Supplementary material for: Dexamethasone may improve severe COVID-19 via ameliorating endothelial injury and inflammation: A preliminary pilot study
Source: PubMed Central journal article supplement (PMC8253399; doi:10.1371/journal.pone.0254167), 2021-07-02
Supplement: pone.0254167.s003.pdf [file pone.0254167.s003.pdf]

**S3 Table. Baseline characteristics and clinical outcomes of the 32 patients with severe COVID-19 according to dexamethasone use.**

|                                        | Dexamethasone<br>(n = 20) | No dexamethasone<br>(n = 12) | <i>P</i> |
|----------------------------------------|---------------------------|------------------------------|----------|
| <b>Baseline characteristics</b>        |                           |                              |          |
| Age, years                             | 70 (59–75)                | 69 (60–79)                   | 0.953    |
| Male sex                               | 11 (55)                   | 6 (50)                       | 0.784    |
| Body mass index, kg/m <sup>2</sup>     | 26.9 (23.4–31.0)          | 22.0 (20.7–24.0)             | 0.001    |
| Smoking status                         |                           |                              | 0.198    |
| Ever smoker                            | 7 (35)                    | 7 (58)                       |          |
| Never smoker                           | 13 (65)                   | 5 (42)                       |          |
| Comorbidities                          |                           |                              |          |
| Diabetes                               | 8 (40)                    | 0                            | 0.014    |
| Hypertension                           | 12 (60)                   | 6 (50)                       | 0.581    |
| Chronic lung disease                   | 5 (25)                    | 2 (17)                       | 0.683    |
| Liver cirrhosis                        | 1 (5)                     | 0                            | >0.99    |
| Malignancy                             | 1 (5)                     | 0                            | >0.99    |
| Charlson Comorbidity Index             | 3.0 (2.0–4.0)             | 3.0 (1.5–3.5)                | 0.460    |
| Time from symptom onset to day 1, days | 8 (7–10)                  | 9 (4–11)                     | 0.891    |
| ARDS                                   | 5 (25)                    | 2 (17)                       | 0.683    |
| qSOFA score                            | 1 (0–1)                   | 1 (0–1)                      | 0.966    |
| Type of oxygen support                 |                           |                              | <0.001   |
| Mechanical ventilation                 | 5 (25)                    | 1 (8)                        |          |
| High-flow nasal cannula                | 11 (55)                   | 0                            |          |
| Supplemental oxygen                    | 4 (20)                    | 11 (92)                      |          |
| Remdesivir                             | 11 (55)                   | 0                            | 0.002    |
| Vital signs and laboratory data        |                           |                              |          |
| Body temperature, °C                   | 37.8 (37.4–38.6)          | 38.0 (37.3–38.3)             | 0.640    |
| Mean blood pressure, mmHg              | 84 (74–96)                | 80 (71–89)                   | 0.391    |
| Heart rate, beats/min                  | 89 (76–95)                | 83 (79–88)                   | 0.508    |
| Respiratory rate, breaths/min          | 21 (20–24)                | 20 (20–24)                   | 0.735    |
| SpO <sub>2</sub> /FiO <sub>2</sub>     | 196 (172–272)             | 377 (291–408)                | <0.001   |
| Creatinine, mg/dL                      | 0.7 (0.6–0.8)             | 0.8 (0.6–0.8)                | 0.654    |
| White cell count, 1000/mm <sup>3</sup> | 7.0 (4.2–8.3)             | 4.8 (3.4–5.8)                | 0.039    |
| Total bilirubin, mg/dL                 | 0.7 (0.5–1.0)             | 0.6 (0.5–0.8)                | 0.410    |
| Lactate dehydrogenase, IU/L            | 408 (313–470)             | 357 (254–434)                | 0.259    |
| C-reactive protein, mg/L               | 111 (65–183)              | 47 (18–92)                   | 0.014    |
| Glucose, mg/dL                         | 141 (118–199)             | 116 (102–128)                | 0.037    |
| Radiologic score                       | 5 (3–6)                   | 2 (1–4)                      | 0.006    |
| Cycle threshold value                  | 25.1 (20.7–28.7)          | 25.9 (19.7–29.8)             | 0.815    |
| <b>Clinical outcomes</b>               |                           |                              |          |
| Oxygen-free days at day 28             | 13.5 ± 8.9                | 13.3 ± 9.3                   | 0.723    |
| Length of hospital stay, days          | 21.9 ± 16.7               | 16.3 ± 4.3                   | 0.666    |
| Hospital mortality                     | 1 (5)                     | 0                            | >0.99    |
| Superinfection                         | 2 (10)                    | 0                            | 0.516    |

Data are presented as number (%), mean ± standard deviation, or median (interquartile range). The *P*-values were calculated using the Mann-Whitney *U* test for continuous variables and using the chi-squared test or Fisher's exact test for categorical variables.

ARDS, acute respiratory distress syndrome; COVID-19, coronavirus disease 2019; FiO<sub>2</sub>, fraction of inspired oxygen; SpO<sub>2</sub>, pulse oximetric saturation; qSOFA, quick Sequential Organ Failure Assessment.
