# Supplementary material for: Dexamethasone may improve severe COVID-19 via ameliorating endothelial injury and inflammation: A preliminary pilot study
Source: PubMed Central journal article supplement (PMC8253399; doi:10.1371/journal.pone.0254167), 2021-07-02
Supplement: pone.0254167.s004.pdf [file pone.0254167.s004.pdf]

**S4 Table. Serial analyses of clinical parameters and plasma biomarkers at days 1, 4, and 7 according to dexamethasone use.**

|                                    | Day 1               | Day 4               | Day 7               | AUC                   | <i>P</i> |
|------------------------------------|---------------------|---------------------|---------------------|-----------------------|----------|
| <b>Clinical parameters</b>         |                     |                     |                     |                       |          |
| Body temperature, °C               |                     |                     |                     |                       | 0.161    |
| DXM group                          | 37.8 (37.4–38.6)    | 36.9 (36.7–37.5)    | 37.0 (36.8–37.4)    | -0.6 (-1.2 to -0.2)   |          |
| Non-DXM group                      | 38.0 (37.3–38.3)    | 37.4 (37.0–38.0)    | 37.2 (37.0–37.3)    | -0.4 (-0.7 to -0.1)   |          |
| Respiratory rate, breaths/min      |                     |                     |                     |                       | 0.646    |
| DXM group                          | 21 (20–24)          | 20 (20–24)          | 20 (20–21)          | 0 (-3 to 0)           |          |
| Non-DXM group                      | 20 (20–24)          | 20 (20–23)          | 20 (20–21)          | 0 (-1 to 0)           |          |
| SpO <sub>2</sub> /FiO <sub>2</sub> |                     |                     |                     |                       | 0.052    |
| DXM group                          | 196 (172–272)       | 240 (207–272)       | 268 (234–338)       | 40 (-3 to 70)         |          |
| Non-DXM group                      | 377 (291–408)       | 348 (272–404)       | 346 (291–379)       | -2 (-32 to 28)        |          |
| Lactate dehydrogenase, IU/L        |                     |                     |                     |                       | 0.755    |
| DXM group                          | 408 (313–470)       | 335 (291–400)       | 325 (261–386)       | -57 (-87 to 2)        |          |
| Non-DXM group                      | 357 (254–434)       | 300 (283–331)       | 302 (243–350)       | -36 (-87 to -3)       |          |
| C-reactive protein, mg/L           |                     |                     |                     |                       | <0.001   |
| DXM group                          | 111 (65–183)        | 27 (19–51)          | 8 (4–24)            | -58 (-113 to -30)     |          |
| Non-DXM group                      | 47 (18–92)          | 43 (16–116)         | 45 (4–114)          | 10 (0 to 30)          |          |
| Glucose, mg/dL                     |                     |                     |                     |                       | 0.284    |
| DXM group                          | 141 (118–199)       | 210 (115–274)       | 192 (111–248)       | 11 (-21 to 87)        |          |
| Non-DXM group                      | 116 (102–128)       | 105 (99–116)        | 104 (98–144)        | -5 (-14 to 11)        |          |
| Radiologic score                   |                     |                     |                     |                       | 0.008    |
| DXM group                          | 5 (3–6)             | 3 (2–4)             | 2 (2–3)             | -1 (-3 to 0)          |          |
| Non-DXM group                      | 2 (1–4)             | 3 (2–3)             | 3 (2–4)             | 0 (0 to 1)            |          |
| Cycle threshold value              |                     |                     |                     |                       | 0.196    |
| DXM group                          | 25.1 (20.7–28.7)    | 27.7 (26.1–30.1)    | 29.5 (26.6–34.8)    | 3.9 (2.1 to 4.8)      |          |
| Non-DXM group                      | 25.9 (19.7–29.8)    | 27.3 (26.0–33.6)    | 31.3 (26.9–34.8)    | 5.3 (3.7 to 5.8)      |          |
| <b>Plasma biomarkers</b>           |                     |                     |                     |                       |          |
| Ang-2, pg/mL                       |                     |                     |                     |                       | 0.001    |
| DXM group                          | 1417 (978–2453)     | 969 (662–1757)      | 1100 (569–1362)     | -294 (-680 to -140)   |          |
| Non-DXM group                      | 929 (897–1155)      | 1174 (803–1281)     | 1145 (800–1958)     | 103 (-7 to 252)       |          |
| sTie2, pg/mL                       |                     |                     |                     |                       | 0.006    |
| DXM group                          | 17464 (13901–22051) | 14176 (11166–18068) | 15002 (11668–19049) | -3044 (-4414 to -484) |          |
| Non-DXM group                      | 14278 (11835–16423) | 13901 (11294–18637) | 13029 (12294–17970) | 90 (-1268 to 1595)    |          |
| Endocan, pg/mL                     |                     |                     |                     |                       | 0.457    |
| DXM group                          | 821 (293–1564)      | 660 (337–885)       | 686 (340–1417)      | 12 (-583 to 277)      |          |

|                                    |                        |                        |                        |                           |       |
|------------------------------------|------------------------|------------------------|------------------------|---------------------------|-------|
| Non-DXM group                      | 1101 (697–1880)        | 676 (639–1881)         | 536 (373–901)          | -167 (-420 to 14)         | 0.043 |
| ICAM-1, pg/mL<br>DXM group         | 448852 (347428–640257) | 416283 (301071–576069) | 420937 (309873–525985) | -39166 (-56899 to -18261) |       |
| Non-DXM group                      | 380511 (279395–560645) | 339304 (279152–582766) | 384361 (266984–524032) | 1835 (-39825 to 19535)    | 0.107 |
| IL-6, pg/mL<br>DXM group           | 30.5 (5.1–49.6)        | 5.1 (3.6–7.9)          | 4.9 (2.1–9.2)          | -20.3 (-33.0 to 0.17)     |       |
| Non-DXM group                      | 17.7 (13.0–28.1)       | 10.1 (7.2–21.7)        | 5.2 (3.0–12.8)         | -3.3 (-7.7 to 0.5)        | 0.023 |
| sRAGE, pg/mL<br>DXM group          | 6141 (3816–8206)       | 2514 (1789–4207)       | 1345 (1022–1863)       | -2690 (-3986 to -1377)    |       |
| Non-DXM group                      | 3740 (2345–6055)       | 3255 (2038–4670)       | 1619 (1389–2001)       | -370 (-2179 to 301)       | 0.650 |
| SP-D, pg/mL<br>DXM group           | 7731 (2854–14272)      | 15018 (9566–24131)     | 15559 (8356–24267)     | 5308 (383 to 9774)        |       |
| Non-DXM group                      | 5027 (3263–6379)       | 10744 (5782–14746)     | 12750 (6683–17433)     | 3209 (1083 to 6610)       | 0.483 |
| Syndecan-1, pg/mL<br>DXM group     | 5639 (4489–7849)       | 7478 (4371–9633)       | 7865 (5809–10756)      | 1164 (22 to 1829)         |       |
| Non-DXM group                      | 4562 (3603–7734)       | 6411 (5006–9753)       | 7351 (4738–8829)       | 1543 (514 to 2129)        | 0.010 |
| TNF- $\alpha$ , pg/mL<br>DXM group | 7.9 (6.3–9.8)          | 6.0 (5.2–8.1)          | 5.8 (5.2–7.6)          | -1.3 (-2.7 to 0.1)        |       |
| Non-DXM group                      | 7.9 (5.1–8.7)          | 6.8 (6.3–8.7)          | 6.3 (5.3–8.9)          | 0.5 (-0.6 to 1.5)         | 0.107 |
| vWF, pg/mL<br>DXM group            | 6805 (2885–8807)       | 3416 (2394–6585)       | 3264 (2181–7563)       | -501 (-2870 to 344)       |       |
| Non-DXM group                      | 2328 (1693–2884)       | 2526 (1755–3685)       | 4439 (1421–6150)       | 254 (-466 to 1108)        | 0.836 |
| IFN- $\alpha$ , pg/mL<br>DXM group | 91.7 (41.3–161.6)      | 34.4 (28.1–41.5)       | 34.4 (24.1–39.0)       | -47.5 (-92.8 to -3.3)     |       |
| Non-DXM group                      | 148.5 (102.6–310.7)    | 53.9 (42.4–214.6)      | 41.6 (35.4–65.7)       | -79.2 (-112.8 to -5.8)    |       |

To avoid multiple comparisons, the median (interquartile range) values for the AUCs of continuous variables were calculated with repeated measurements. The *P*-values were calculated using the Mann-Whitney *U* test.

Ang-2, angiotensin-2; AUC, area under the curve; DXM, dexamethasone; FiO<sub>2</sub>, fraction of inspired oxygen; ICAM-1, intercellular adhesion molecule-1; IFN- $\alpha$ , interferon- $\alpha$ ; IL-6, interleukin-6; SpO<sub>2</sub>, pulse oximetric saturation; sTie2, soluble form of the Tie2 receptor; sRAGE, soluble receptor for advanced glycation end-products; SP-D, surfactant protein D; TNF- $\alpha$ , tumor necrosis factor- $\alpha$ ; vWF, von Willebrand factor.
